# Supplementary material for: Internal cueing improves gait more than external cueing in healthy adults and people with Parkinson disease
Source: PubMed Central journal article supplement (PMC6195608; doi:10.1038/s41598-018-33942-6), 2018-10-19
Supplement: 41598_2018_33942_MOESM1_ESM.pdf [file 41598_2018_33942_MOESM1_ESM.pdf]

## Internal cueing improves gait more than external cueing in healthy adults and people with Parkinson disease

Authors: Elinor C Harrison<sup>1</sup>, Adam P Horin<sup>1</sup>, and Gammon M Earhart<sup>1-3,\*</sup>

<sup>1</sup>Program in Physical Therapy, Washington University School of Medicine, St Louis, Missouri, United States of America

<sup>2</sup>Department of Neurology, Washington University School of Medicine, St Louis, Missouri, United States of America

<sup>3</sup>Department of Neuroscience, Washington University School of Medicine, St Louis, Missouri, United States of America

**Supplementary Table 1. Means and standard deviations of gait characteristics and variabilities for different cueing conditions, averaged across participants for each group.**

|                 |               | Normalized Velocity (cm/s/leg length) |             |             | Cadence (steps/min) |               |                | Stride Length (cm)     |                |                |
|-----------------|---------------|---------------------------------------|-------------|-------------|---------------------|---------------|----------------|------------------------|----------------|----------------|
|                 |               | YC                                    | OC          | PD          | YC                  | OC            | PD             | YC                     | OC             | PD             |
| <b>Forward</b>  | <b>Uncued</b> | 1.71 (0.21)                           | 1.66 (0.16) | 1.53 (0.21) | 110.58 (6.74)       | 112.14 (6.02) | 110.90 (7.84)  | 149.47 (10.31)         | 143.51 (15.28) | 134.08 (15.58) |
|                 | <b>Music</b>  | 1.70 (0.20)                           | 1.69 (0.16) | 1.56 (0.20) | 110.60 (7.31)       | 113.28 (6.66) | 111.13 (7.71)  | 148.58 (9.29)          | 144.34 (12.10) | 134.16 (15.66) |
|                 | <b>Sing</b>   | 1.73(0.22)                            | 1.68 (0.17) | 1.56 (0.26) | 112.49 (7.89)       | 114.43 (7.62) | 112.72 (8.63)  | 147.93 (10.16)         | 142.15 (13.22) | 133.02 (17.23) |
| <b>Backward</b> | <b>Uncued</b> | 1.32 (0.22)                           | 1.17 (0.19) | 0.99 (0.23) | 107.29 (9.19)       | 110.86 (9.46) | 112.30 (9.93)  | 118.72 (13.36)         | 102.77 (16.47) | 83.48 (21.55)  |
|                 | <b>Music</b>  | 1.33 (0.21)                           | 1.26 (0.21) | 1.07 (0.22) | 107.24 (9.12)       | 110.72 (9.44) | 112.96 (10.43) | 119.83 (12.33)         | 109.67 (15.88) | 90.45 (20.35)  |
|                 | <b>Sing</b>   | 1.41 (0.21)                           | 1.28 (0.21) | 1.10 (0.22) | 110.71 (8.68)       | 112.89 (9.54) | 115.54 (10.02) | 123.38 (13.14)         | 109.86 (17.04) | 91.15 (20.90)  |
|                 |               | Stride Length CV                      |             |             | Stride Time CV      |               |                | Single Support Time CV |                |                |
|                 |               | YC                                    | OC          | PD          | YC                  | OC            | PD             | YC                     | OC             | PD             |
| <b>Forward</b>  | <b>Uncued</b> | 1.83 (0.77)                           | 2.18 (0.67) | 2.73 (1.43) | 1.73 (0.59)         | 2.19 (0.82)   | 2.24 (0.71)    | 2.55 (0.75)            | 3.19 (1.07)    | 3.78 (1.09)    |
|                 | <b>Music</b>  | 2.77 (1.19)                           | 2.79 (1.32) | 4.07 (2.59) | 2.25 (0.85)         | 2.32 (1.05)   | 2.45 (0.77)    | 3.43 (1.17)            | 3.78 (1.77)    | 4.32 (1.58)    |
|                 | <b>Sing</b>   | 2.04 (0.84)                           | 2.35 (1.04) | 2.52 (0.93) | 1.65 (0.61)         | 1.86 (0.57)   | 2.02 (0.66)    | 3.02 (0.79)            | 3.18 (0.71)    | 3.82 (1.25)    |
| <b>Backward</b> | <b>Uncued</b> | 4.33 (1.44)                           | 6.11 (2.38) | 7.77 (2.99) | 3.11 (0.97)         | 3.84 (1.28)   | 4.15 (1.54)    | 5.03 (1.18)            | 5.97 (1.68)    | 7.14 (2.70)    |
|                 | <b>Music</b>  | 5.35 (2.14)                           | 6.18 (2.35) | 7.59 (2.54) | 3.27 (1.89)         | 3.01 (0.86)   | 3.63 (1.89)    | 5.29 (2.36)            | 5.44 (1.79)    | 6.63 (2.83)    |
|                 | <b>Sing</b>   | 4.19 (1.42)                           | 5.65 (2.03) | 7.12 (2.97) | 2.81 (0.71)         | 2.64 (0.86)   | 3.25 (1.19)    | 4.56 (1.12)            | 4.99 (1.45)    | 5.99 (1.98)    |

See figures for significance.
